# Supplementary material
Source: publisher figshare collection journal article supplement (https://karger.figshare.com/articles/dataset/_/20317263)
Supplement: Supplementary file 1 [file 1]

**Supplementary Figure 1.** **Serum levels of sex hormones in males with central serous chorioretinopathy and healthy controls limited to an age of 70 years old.** The serum levels of albumin, sex hormone-binding globulin (SHBG), total testosterone, and estradiol (E2) were determined to calculate the levels of free testosterone (fT) and the free testosterone/estradiol-ratio. For each value, the mean and standard deviation is depicted. Two-sided p-values < 0.05 were considered to be statistically significant. The Bonferroni correction was applied to compensate for multiple testing.

**Supplementary Figure 2. Serum levels of sex hormones in females with central serous chorioretinopathy and healthy controls aged over 45 years old.** The serum levels of albumin, sex hormone-binding globulin (SHBG), total testosterone, and estradiol (E2) were determined to calculate the levels of free testosterone (fT) and the free testosterone/estradiol-ratio. For each value, the mean and standard deviation is depicted. Two-sided p-values of <0.05 were considered to be statistically significant. The Bonferroni correction was applied to compensate for multiple testing.
